# Supplementary material for: Microarray Analysis of LTR Retrotransposon Silencing Identifies Hdac1 as a Regulator of Retrotransposon Expression in Mouse Embryonic Stem Cells
Source: PubMed Central journal article supplement (PMC3343110; doi:10.1371/journal.pcbi.1002486), 2012-04-26

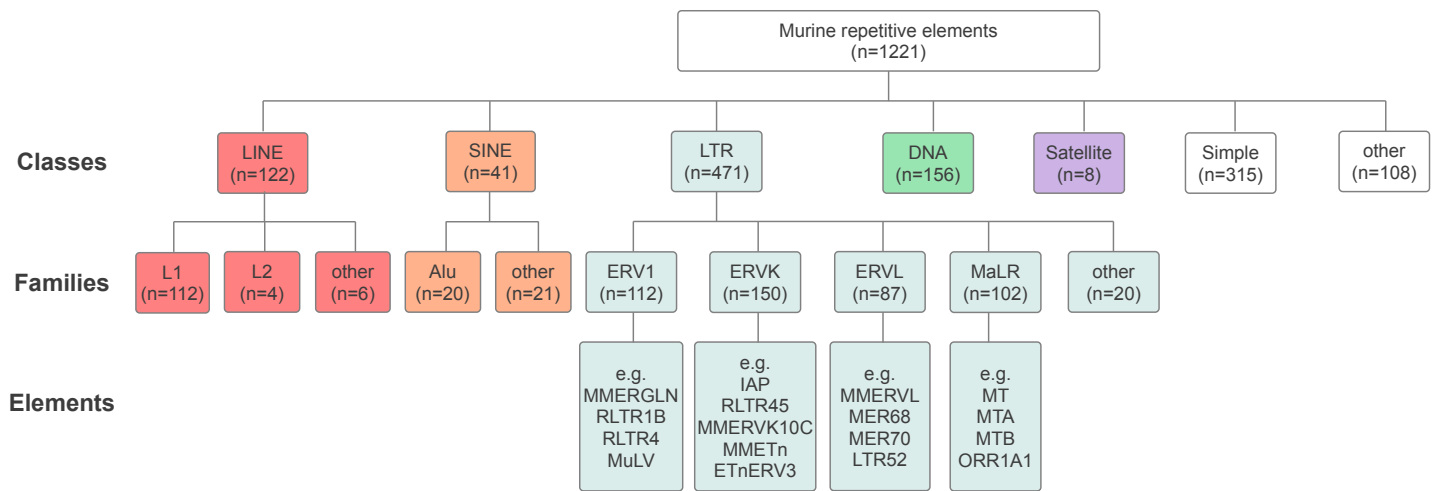

Supplement: pcbi.1002486.s006.pdf [file pcbi.1002486.s006.pdf]
