# Supplementary material for: Microarray Analysis of LTR Retrotransposon Silencing Identifies Hdac1 as a Regulator of Retrotransposon Expression in Mouse Embryonic Stem Cells
Source: PubMed Central journal article supplement (PMC3343110; doi:10.1371/journal.pcbi.1002486), 2012-04-26
Supplement: pcbi.1002486.s007.pdf [file pcbi.1002486.s007.pdf]

| <b>Gene / Repeat</b>   | <b>Primer Sequences</b>                                          |
|------------------------|------------------------------------------------------------------|
| <i>β-Actin</i>         | 5'-AGAGCTATGAGCTGCCTGACG-3'<br>5'-TGTGTTGGCATAGAGGTCTTTACG-3'    |
| <i>Gapdh</i>           | 5'-ACCCAGAAGACTGTGGATGG-3'<br>5'-GGTCCTCAGTGTAGCCCAAG-3'         |
| <i>Sdmg1</i>           | 5'-TCTGTGTTGAGATGCTGTTCG-3'<br>5'-AGGCTGGCGAGAAGTTATGA-3'        |
| <i>IAP</i>             | 5'-GCACCTCAAAGCCTATCTTA-3'<br>5'-TCCCTTGGTCAGTCTGGATT-3'         |
| <i>IAP.int.1</i>       | 5'-CAGAAGATTCTGGTCTGTGGTGT-3'<br>5'-GAATTCATACAGTTGAATCCTTCT-3'  |
| <i>IAP.int.2</i>       | 5'-AGCAGGTGAAGCCACTG-3'<br>5'-CTTGCCACACTTAGAGC-3'               |
| <i>IAP.chr10</i>       | 5'-GTGCTCTGCCTTACAACCTCG-3'<br>5'-AAGACGCAGCAAACCAGAAT-3'        |
| <i>LINE1 5'UTR</i>     | 5'-GGAGTCTGCGTTCTGATGA-3'<br>5'-GGCGAAAGGCAAACGTAAGA-3'          |
| <i>LINE1 5'UTR.b</i>   | 5'-GAAATTAGTCTGAACAGGTGAGAGG-3'<br>5'-TCCTCTGGTCCGGAAGGT-3'      |
| <i>LINE1 ORF2</i>      | 5'-GGAGGGACATTTTCATTCTCATC-3'<br>5'-GCTGCTCTTGATTTGGAGCATAGA-3'  |
| <i>MERVL2a</i>         | 5'-GCCAGAGAGGTGCGGCAGTGGGC-3'<br>5'-GGACCCGTGGATCCTGGCTGTGGGA-3' |
| <i>ETnERV2</i>         | 5'-ACAAATTCAGTATGGGCATC-3'<br>5'-GGGTACTGTTAAGACCCACA-3'         |
| <i>IAPEY3</i>          | 5'-ACAGAGGAGGACAACCTGCTC-3'<br>5'-AACCTTACACAGGCAAAAGC-3'        |
| <i>MMERVK10C gag</i>   | 5'-CCTTTCCATGGTGTGATAGC-3'<br>5'-TGAATTTGTAGCTCGCATGA-3'         |
| <i>MMERVK10C pol</i>   | 5'-GTGATCTTCCAGCATCATCC-3'<br>5'-GCCAAGGCATAATTGAGAGA-3'         |
| <i>MMERVK10C env.a</i> | 5'-TTTGTTTTGTCACCCCCACT-3'<br>5'-TTCCAGTCAGCAATGCAAAG-3'         |
| <i>MMERVK10C env.b</i> | 5'-CTTACCCTGCAAAAGGTGGA-3'<br>5'-TGGATGCCACACAACCTCATT-3'        |
| <i>MMERVK10C env.c</i> | 5'-AACTGGTCGCAGGAGCTG-3'<br>5'-GGTAAAGTCTCCGAGGGTCA-3'           |
| <i>MMERVK10C env.d</i> | 5'-CCATATGCTGTGGACTGGTG-3'<br>5'-GCCGTTTTCAATGGCTAAAA-3'         |
| <i>MMERGLN</i>         | 5'-CCTGGAGGATTTGACCTAGACA-3'<br>5'-CCCAGGTATACCCTTTTGTCC-3'      |
| <i>RLTR4.int.chr8</i>  | 5'-CATACTTCTGCCCCAGCTAA-3'<br>5'-CAGTAATCGGTGGTGAGGTC-3'         |
| <i>RLTR4.int.1</i>     | 5'-ACAAAGGCCTCCTCACTTCT-3'<br>5'-TGCCCTCATCTTCTGATAGC-3'         |
| <i>RLTR4.int.2</i>     | 5'-TGGCCCATTCTGTATCAGTT-3'<br>5'-AGTTACGGTCTGTCCCATGA-3'         |
| <i>MuLV.int</i>        | 5'-GGCAGCCATACATACAGACC-3'<br>5'-TGGTCTGCATAGAAACAGCA-3'         |
| <i>RLTR45</i>          | 5-TGCTTTTCCGACATGGTAAT-3'<br>5'-AGTAACCCTGACCTGCTCCT-3'          |
